# Supplementary material
Source: PubMed Central journal article supplement (PMC5517103)
Supplement: NIHMS875534-supplement-Supplemental.pdf [file NIHMS875534-supplement-Supplemental.pdf]

# The Generalized Higher Criticism for Testing SNP-set Effects in Genetic Association Studies: Supplementary Materials

## 1 Proof of Theorem 1

We first calculate

$$\begin{aligned}
 & Cov\left(\sum_{k=1}^p I_{\{|Z_k|>t_i\}}, \sum_{k=1}^p I_{\{|Z_k|>t_j\}}\right) \\
 &= E\left(\left(\sum_{k=1}^p I_{\{|Z_k|>t_i\}}\right)\left(\sum_{k=1}^p I_{\{|Z_k|>t_j\}}\right)\right) - E\left(\sum_{k=1}^p I_{\{|Z_k|>t_i\}}\right)E\left(\sum_{k=1}^p I_{\{|Z_k|>t_j\}}\right) \\
 &= p[2\bar{\Phi}(\max\{t_i, t_j\}) - 4\bar{\Phi}(t_i)\bar{\Phi}(t_j)] + \sum_{k \neq l} [P(|Z_k| > t_i, |Z_l| > t_j) - 4\bar{\Phi}(t_i)\bar{\Phi}(t_j)]
 \end{aligned}$$

So it is sufficient to show that

$$\sum_{k \neq l} [P(|Z_k| > t_i, |Z_l| > t_j) - 4\bar{\Phi}(t_i)\bar{\Phi}(t_j)] = 4p(p-1)\phi(t_i)\phi(t_j) \sum_{n=1}^{\infty} \frac{\mathcal{H}_{2n-1}(t_i)\mathcal{H}_{2n-1}(t_j)r^{2n}}{(2n)!}$$

Letting  $r_{k,l} = Cov(Z_k, Z_l)$ , Schwartzman and Lin (2011) showed that

$$P(Z_k > t_i, Z_l > t_j) = \bar{\Phi}(t_i)\bar{\Phi}(t_j) + \phi(t_i)\phi(t_j) \sum_{n=1}^{\infty} \frac{r_{k,l}^n}{n!} \mathcal{H}_{n-1}(t_i)\mathcal{H}_{n-1}(t_j)$$

Because  $Z_k$  and  $Z_l$  are bivariate normal we can rewrite  $P(|Z_k| > t_i, |Z_l| > t_j)$  as:

$$P(|Z_k| > t_i, |Z_l| > t_j) = 2(\bar{\Phi}(t_i) - P(Z_k > t_i, Z_l > -t_j) + P(Z_k > t_i, Z_l > t_j))$$

Plugging back in yields:

$$\begin{aligned}
& \sum_{k \neq l} [P(|Z_k| > t_i, |Z_l| > t_j) - 4\bar{\Phi}(t_i)\bar{\Phi}(t_j)] \\
&= \sum_{k \neq l} 2\phi(t_i)\phi(t_j) \sum_{n=1}^{\infty} \frac{r_{k,l}^n}{n!} \mathcal{H}_{n-1}(t_i)(\mathcal{H}_{n-1}(t_j) - \mathcal{H}_{n-1}(-t_j)) \\
&= 2\phi(t_i)\phi(t_j) \sum_{n=1}^{\infty} \frac{\mathcal{H}_{n-1}(t_i)(\mathcal{H}_{n-1}(t_j) - \mathcal{H}_{n-1}(-t_j))}{n!} \sum_{k \neq l} r_{k,l}^n \\
&= 4p(p-1)\phi(t_i)\phi(t_j) \sum_{n=1}^{\infty} \frac{\mathcal{H}_{2n-1}(t_i)\mathcal{H}_{2n-1}(t_j)r^{2n}}{(2n)!}
\end{aligned}$$

## 2 Proof of the GHC p-value calculation

Using the results in the main text, we have

$$\begin{aligned}
pr(GHC \geq h) &= 1 - pr \left( \bigcap_{t>0} \left\{ S(t) < h\sqrt{\widehat{Var}(S(t))} + 2p\bar{\Phi}(t) \right\} \right) \\
&= 1 - pr \left( \bigcap_{k=1}^p \{S(t_k) < p - k + 1\} \right)
\end{aligned}$$

where the  $t_k$  are defined in equation (5) of the main text. We are able to write the intersection over all  $t > 0$  as an intersection of  $p$  events due to the monotone nature of  $h\sqrt{\widehat{Var}(S(t))} + 2p\bar{\Phi}(t)$  combined with the fact that  $S(t)$  can only take on the values  $\{0, 1, \dots, p\}$ . Applying the chain rule of conditioning leads to:

$$\begin{aligned}
pr(GHC \geq h) &= 1 - pr \left( \bigcap_{k=1}^p \{S(t_k) < p - k + 1\} \right) \\
&= 1 - \prod_{k=1}^p pr \left( S(t_k) \leq p - k \mid \bigcap_{l=1}^{k-1} \{S(t_l) \leq p - l\} \right) = 1 - \prod_{k=1}^p \sum_{a=0}^{p-k} q_{k,a}
\end{aligned}$$

### 2.1 Proof of Theorem 2

Let  $\sigma_a(t) = \sqrt{\widehat{Var}(S(t))}$  and  $\sigma_s(t) = \sqrt{2p\bar{\Phi}(t)(1 - 2\bar{\Phi}(t))}$ , and then let  $HC(t) = \{S(t) - 2p\bar{\Phi}(t)\}/\sigma_s(t)$  and  $GHC(t) = \{S(t) - 2p\bar{\Phi}(t)\}/\sigma_a(t)$ . Noting that  $GHC(t)$  is a

mean 0 variance 1 random variable,

$$\begin{aligned}
pr_{H_0}(GHC > c) &\leq \sum_{t \in [s, \sqrt{5 \log p}] \cap \mathbb{N}} pr_{H_0}(GHC(t) > c) \\
&\leq \sum_{t \in [s, \sqrt{5 \log p}] \cap \mathbb{N}} 1/c^2 && \text{by Chebyshev's Inequality} \\
&= \frac{O(\sqrt{\log p})}{c^2}
\end{aligned}$$

Hence for  $c = O(\log p)$  we have that  $pr_{H_0}(GHC > c) \rightarrow 0$ . Without loss of generality take  $c = \log p$ .

Now we study the behavior of GHC under the alternative. By Arias-Castro et al. (2011) we have that if  $\max_j |\beta_j| \geq \sqrt{6 \log p}$ , then

$$HC(\sqrt{5 \log p}) \geq p^{3/4} \tag{S.1}$$

with probability greater than  $1 - o(1/\sqrt{p})$ . For the rest of the alternatives satisfying

$A \leq \max_j |\beta_j| \leq \sqrt{6 \log p}$ , it suffices to show that there exists a  $t \in [\sqrt{2 \min(1, 4c^*(\alpha)) \log p}, \sqrt{5 \log p}] \cap \mathbb{N}$  such that  $E_{H_1}(GHC(t)) \gg \log p$  and  $\frac{E_{H_1}(GHC(t))}{\sqrt{Var_{H_1}(GHC(t))}} \rightarrow \infty$ .

Letting  $HC(t) = GHC(t) \frac{\sigma_a(t)}{\sigma_s(t)}$ , we have that

$$\frac{E_{H_1}(GHC(t))}{\sqrt{Var_{H_1}(GHC(t))}} = \frac{E_{H_1}(HC(t))}{\sqrt{Var_{H_1}(HC(t))}}.$$

In Arias-Castro et al. (2011), proof of theorem 3, they show that for  $t = \sqrt{2 \min(1, 4\gamma) \log p}$ ,

$$\frac{E_{H_1}(HC(t))}{\sqrt{Var_{H_1}(HC(t))}} \rightarrow \infty. \text{ Hence, for the same } t, \frac{E_{H_1}(GHC(t))}{\sqrt{Var_{H_1}(GHC(t))}} \rightarrow \infty.$$

We will show that for that same  $t$ ,  $E_{H_1}(GHC(t)) = \frac{\sigma_s(t)}{\sigma_a(t)} E_{H_1}(HC(t)) \gg \log p$ .

For the same  $t$ , Arias-Castro et al. (2011) show that  $E_{H_1}(HC(t)) \gg (\log p)^2 \sqrt{\Delta}$ . This implies that  $E_{H_1}(GHC(t)) \gg \frac{\sigma_s(t)}{\sigma_a(t)} (\log p)^2 \sqrt{\Delta}$ .

Arias-Castro et al. (2011) showed that  $Var_{H_0}(HC(t')) \leq c' (\log p)^2 \Delta$  for some constant  $c' > 0$ . Combine this inequality with the fact that  $Var_{H_0}(HC(t')) = \frac{\sigma_a^2(t')}{\sigma_s^2(t')}$ , we

have that  $\frac{\sigma_s(t)}{\sigma_a(t)} \leq \frac{1}{\sqrt{c'} \log p \sqrt{\Delta}}$ . Hence,

$$E_{H_1}(GHC(t)) \gg \frac{1}{\sqrt{c'} \log p \sqrt{\Delta}} (\log p)^2 \sqrt{\Delta} = O(\log p)$$

Therefore  $E_{H_1}(GHC(t)) \gg \log p$  as required. Using equation (S.1) we evaluate the case where  $t = \sqrt{5 \log p}$  as

$$GHC(\sqrt{5 \log p}) = HC(\sqrt{5 \log p}) \frac{\sigma_s(\sqrt{5 \log p})}{\sigma_a(\sqrt{5 \log p})} \gg p^{3/4} \frac{1}{\log p \sqrt{\Delta}} \gg \log p.$$

## References

- Arias-Castro, E., Candès, E., and Plan, Y. (2011). Global testing under sparse alternatives: Anova, multiple comparisons and the higher criticism. *The Annals of Statistics* **39**, 2533–2556.
- Schwartzman, A. and Lin, X. (2011). The effect of correlation in false discovery rate estimation. *Biometrika* **98**, 199–214.
